# Supplementary material for: Impact of Fire Recurrence and Induced Water Stress on Seed Germination and Root Mitotic Cell Cycle of Pinus pinaster Aiton
Source: MDPI journal article supplement (doi:10.3390/f14010078), 2022-12-31
Supplement: s1 [file s1]

## Electronic Supplementary Material

**Table S1.** Mean ( $\pm$  S.E.) number of normal and irregular cells in prophase, metaphase, anaphase, and telophase determined per stand (S) and PEG treatment (T). Different lowercase letters per column indicate statistically significant differences ( $p$ -value  $< 0.05$ ) among S or T based on the Tukey's test.

|                     |              | Normal dividing cells in the following mitotic phases:    |                               |                              |                               |
|---------------------|--------------|-----------------------------------------------------------|-------------------------------|------------------------------|-------------------------------|
|                     |              | Prophase<br>(Mean $\pm$ S.E)                              | Metaphase<br>(Mean $\pm$ S.E) | Anaphase<br>(Mean $\pm$ S.E) | Telophase<br>(Mean $\pm$ S.E) |
| Stand (S)           | C            | 154.44 $\pm$ 91.91 a                                      | 0.22 $\pm$ 0.22 a             | 0.00 $\pm$ 0.00 a            | 2.22 $\pm$ 1.28 a             |
|                     | A1           | 455.56 $\pm$ 227.04 a                                     | 6.11 $\pm$ 3.20 b             | 1.89 $\pm$ 1.18 b            | 7.22 $\pm$ 5.88 a             |
|                     | B2           | 254.11 $\pm$ 106.97 a                                     | 4.11 $\pm$ 2.18 a,b           | 0.11 $\pm$ 0.11 a            | 3.22 $\pm$ 1.31 a             |
|                     | D3           | 269.78 $\pm$ 106.39 a                                     | 0.67 $\pm$ 0.44 a             | 0.00 $\pm$ 0.00 a            | 5.11 $\pm$ 3.00 a             |
| Treatment (T)       | 0%PEG        | 435.00 $\pm$ 120.68 a                                     | 6.75 $\pm$ 2.74 b             | 1.25 $\pm$ 0.92 a            | 7.67 $\pm$ 4.31 a             |
|                     | 10%PEG       | 305.92 $\pm$ 143.64 a                                     | 1.58 $\pm$ 0.45 a             | 0.25 $\pm$ 0.13 a            | 5.67 $\pm$ 2.26 a             |
|                     | 20%PEG       | 109.50 $\pm$ 91.03 a                                      | 0.00 $\pm$ 0.00 a             | 0.00 $\pm$ 0.00 a            | 0.00 $\pm$ 0.00 a             |
| ANOVA<br>$p$ -value | S            | 0.4828                                                    | 0.0282                        | 0.0398                       | 0.6743                        |
|                     | T            | 0.1686                                                    | 0.0029                        | 0.1329                       | 0.1279                        |
|                     | S $\times$ T | 0.3069                                                    | 0.0381                        | 0.0613                       | 0.1205                        |
|                     |              | Irregular dividing cells in the following mitotic phases: |                               |                              |                               |
|                     |              | Prophase<br>(Mean $\pm$ S.E)                              | Metaphase<br>(Mean $\pm$ S.E) | Anaphase<br>(Mean $\pm$ S.E) | Telophase<br>(Mean $\pm$ S.E) |
| Stand (S)           | C            | 10.78 $\pm$ 8.57 a                                        | 1.37 $\pm$ 0.71 a             | 0.11 $\pm$ 0.06 a            | 1.03 $\pm$ 0.54 a             |
|                     | A1           | 4.89 $\pm$ 2.18 a                                         | 3.59 $\pm$ 1.25 a,b           | 0.66 $\pm$ 0.17 a            | 0.33 $\pm$ 0.12 a             |
|                     | B2           | 10.74 $\pm$ 5.06 a                                        | 5.48 $\pm$ 1.85 b             | 1.96 $\pm$ 0.51 b            | 5.64 $\pm$ 1.91 b             |
|                     | D3           | 1.37 $\pm$ 0.56 a                                         | 4.26 $\pm$ 1.44 a,b           | 0.33 $\pm$ 0.13 a            | 0.78 $\pm$ 0.24 a             |
| Treatment (T)       | 0%PEG        | 10.36 $\pm$ 6.46 a                                        | 5.44 $\pm$ 1.29 b             | 1.33 $\pm$ 0.39 b            | 3.77 $\pm$ 1.45 b             |
|                     | 10%PEG       | 8.83 $\pm$ 3.90 a                                         | 5.53 $\pm$ 1.48 b             | 0.85 $\pm$ 0.18 b            | 2.06 $\pm$ 0.54 a,b           |
|                     | 20%PEG       | 1.64 $\pm$ 1.09 a                                         | 0.06 $\pm$ 0.06 a             | 0.03 $\pm$ 0.02 a            | 0.00 $\pm$ 0.00 a             |
| ANOVA<br>$p$ -value | S            | 0.4565                                                    | 0.1566                        | <0.0001                      | 0.0002                        |
|                     | T            | 0.3117                                                    | 0.0007                        | 0.0002                       | 0.0051                        |
|                     | S $\times$ T | 0.0718                                                    | 0.4473                        | 0.0009                       | 0.0051                        |

**Table S2.** Mean ( $\pm$  S.E.) number of irregular dividing cells in different mitotic phases showing various types of anomalies determined per stand (S) and PEG treatment (T). Different lowercase letters per column indicate statistically significant differences ( $p$ -value  $< 0.05$ ) among S or T based on the Tukey's test.

|                     |              | Prophase anomalies:     |                         |                                   |
|---------------------|--------------|-------------------------|-------------------------|-----------------------------------|
|                     |              | Stickiness of chromatin | Presence of micronuclei | Binucleate cell                   |
| Stand (S)           | C            | 32.33 $\pm$ 25.08 a     | 0.00 $\pm$ 0.00 a       | 0.00 $\pm$ 0.00 a                 |
|                     | A1           | 12.89 $\pm$ 5.73 a      | 1.67 $\pm$ 1.18 a       | 0.11 $\pm$ 0.11 a                 |
|                     | B2           | 29.67 $\pm$ 13.44 a     | 0.67 $\pm$ 0.47 a       | 1.89 $\pm$ 1.09 b                 |
|                     | D3           | 4.00 $\pm$ 1.33 a       | 0.11 $\pm$ 0.11 a       | 0.00 $\pm$ 0.00 a                 |
| Treatment (T)       | 0%PEG        | 30.75 $\pm$ 18.48 a     | 0.33 $\pm$ 0.14 a       | 0.00 $\pm$ 0.00 a                 |
|                     | 10%PEG       | 24.58 $\pm$ 10.49 a     | 1.00 $\pm$ 0.91 a       | 0.92 $\pm$ 0.83 a                 |
|                     | 20%PEG       | 3.83 $\pm$ 3.24 a       | 0.50 $\pm$ 0.36 a       | 0.58 $\pm$ 0.31 a                 |
| ANOVA<br>$p$ -value | S            | 0.3293                  | 0.2358                  | 0.0660                            |
|                     | T            | 0.1976                  | 0.6622                  | 0.4153                            |
|                     | S $\times$ T | 0.0332                  | 0.2154                  | 0.6214                            |
|                     |              | Metaphase anomalies:    |                         |                                   |
|                     |              | Stickiness of chromatin | C-mitosis               | Disturbed chromosomal orientation |
| Stand (S)           | C            | 0.78 $\pm$ 0.47 a       | 3.33 $\pm$ 1.99 a       | 0.00 $\pm$ 0.00 a                 |
|                     | A1           | 1.33 $\pm$ 0.75 a       | 8.67 $\pm$ 3.08 a       | 0.78 $\pm$ 0.66 a                 |
|                     | B2           | 6.44 $\pm$ 2.31 b       | 8.78 $\pm$ 4.83 a       | 1.22 $\pm$ 0.98 a                 |
|                     | D3           | 3.11 $\pm$ 1.66 a,b     | 9.33 $\pm$ 3.46 a       | 0.33 $\pm$ 0.23 a                 |
| Treatment (T)       | 0%PEG        | 5.33 $\pm$ 2.03 b       | 10.17 $\pm$ 2.68 b      | 0.83 $\pm$ 0.75 a                 |
|                     | 10%PEG       | 3.42 $\pm$ 0.85 b       | 12.25 $\pm$ 3.66 b      | 0.92 $\pm$ 0.50 a                 |
|                     | 20%PEG       | 0.00 $\pm$ 0.00 a       | 0.17 $\pm$ 0.17 a       | 0.00 $\pm$ 0.00 a                 |
| ANOVA<br>$p$ -value | S            | 0.0126                  | 0.3730                  | 0.5323                            |
|                     | T            | 0.0050                  | 0.0027                  | 0.4160                            |
|                     | S $\times$ T | 0.1283                  | 0.0589                  | 0.5336                            |

**Table S2.** (continued)

|                       |        | Anaphase anomalies:     |                     |                    |                                   |                                   |
|-----------------------|--------|-------------------------|---------------------|--------------------|-----------------------------------|-----------------------------------|
|                       |        | Stickiness of chromatin | Laggard chromosomes | Chromatin bridges  | Polarity disturbances             | Disturbed chromosomal orientation |
| Stand (S)             | C      | 0.11 ± 0.11 a           | 0.00 ± 0.00 a       | 0.22 ± 0.15 a      | 0.22 ± 0.22 a                     | 0.00 ± 0.00 a                     |
|                       | A1     | 0.33 ± 0.24 a           | 1.33 ± 0.65 b       | 0.33 ± 0.23 a      | 0.00 ± 0.00 a                     | 0.78 ± 0.36 b                     |
|                       | B2     | 4.11 ± 1.98 b           | 1.56 ± 0.63 b       | 3.11 ± 1.22 b      | 0.33 ± 0.23 a                     | 0.67 ± 0.33 a,b                   |
|                       | D3     | 0.44 ± 0.24 a           | 0.44 ± 0.44 a,b     | 0.22 ± 0.15 a      | 0.33 ± 0.33 a                     | 0.22 ± 0.22 a,b                   |
| Treatment (T)         | 0%PEG  | 2.75 ± 1.53 b           | 1.50 ± 0.54 b       | 2.00 ± 0.97 b      | 0.17 ± 0.17 a                     | 0.25 ± 0.18 a                     |
|                       | 10%PEG | 1.00 ± 0.51 a,b         | 1.00 ± 0.51 a,b     | 0.83 ± 0.41 b      | 0.50 ± 0.29 a                     | 0.92 ± 0.34 b                     |
|                       | 20%PEG | 0.00 ± 0.00 a           | 0.00 ± 0.00 a       | 0.08 ± 0.08 a      | 0.00 ± 0.00 a                     | 0.08 ± 0.08 a                     |
| ANOVA <i>p</i> -value | S      | 0.0037                  | 0.0499              | 0.0003             | 0.6858                            | 0.1031                            |
|                       | T      | 0.0285                  | 0.0245              | 0.0107             | 0.1952                            | 0.0232                            |
|                       | S × T  | 0.0180                  | 0.0984              | 0.0120             | 0.3168                            | 0.3435                            |
|                       |        | Telophase anomalies:    |                     |                    |                                   |                                   |
|                       |        | Stickiness of chromatin | Chromatin bridges   | Laggard chromosome | Disturbed chromosomal orientation |                                   |
| Stand (S)             | C      | 3.11 ± 2.02 a           | 0.22 ± 0.22 a       | 0.78 ± 0.47 a      | 0.00 ± 0.00 a                     |                                   |
|                       | A1     | 0.67 ± 0.37 a           | 0.11 ± 0.11 a       | 0.00 ± 0.00 a      | 0.56 ± 0.24 a,b                   |                                   |
|                       | B2     | 18.00 ± 6.00 b          | 0.44 ± 0.24 a       | 2.78 ± 1.19 b      | 1.33 ± 0.80 b                     |                                   |
|                       | D3     | 0.89 ± 0.46 a           | 0.67 ± 0.55 a       | 0.89 ± 0.56 a      | 0.67 ± 0.37 a,b                   |                                   |
| Treatment (T)         | 0%PEG  | 12.42 ± 5.06 c          | 0.50 ± 0.23 a       | 2.08 ± 0.95 b      | 0.08 ± 0.08 a                     |                                   |
|                       | 10%PEG | 4.58 ± 1.86 b           | 0.58 ± 0.42 a       | 1.25 ± 0.49 a,b    | 1.83 ± 0.56 b                     |                                   |
|                       | 20%PEG | 0.00 ± 0.00 a           | 0.00 ± 0.00 a       | 0.00 ± 0.00 a      | 0.00 ± 0.00 a                     |                                   |
| ANOVA <i>p</i> -value | S      | < 0.0001                | 0.5873              | 0.0078             | 0.0248                            |                                   |
|                       | T      | < 0.0001                | 0.2582              | 0.0126             | <0.0001                           |                                   |
|                       | S × T  | < 0.0001                | 0.1754              | 0.0113             | 0.0068                            |                                   |
